# Supplementary material
Source: PubMed Central journal article supplement (PMC3422010)
Supplement: MCB.00814-12_zmb999109633so2.pdf [file MCB.00814-12_zmb999109633so2.pdf]

Supplemental table 2 - RNAi phenotypes

| Gene symbol | Human homologue | single knockdown  |                 |               |                       |            | double knockdown with polo |                 |               |                       | double knockdown with aur |                 |               |                       | double knockdown with cdc2 |                 |               |                       | double knockdown with Ckl1β |                 |               |                       |
|-------------|-----------------|-------------------|-----------------|---------------|-----------------------|------------|----------------------------|-----------------|---------------|-----------------------|---------------------------|-----------------|---------------|-----------------------|----------------------------|-----------------|---------------|-----------------------|-----------------------------|-----------------|---------------|-----------------------|
|             |                 | centrosome number | centrosome size | mitotic index | chromosome aberration | FACS       | centrosome number          | centrosome size | mitotic index | chromosome aberration | centrosome number         | centrosome size | mitotic index | chromosome aberration | centrosome number          | centrosome size | mitotic index | chromosome aberration | centrosome number           | centrosome size | mitotic index | chromosome aberration |
| Grip84      | TUBGCP2         | 1                 |                 | high          | •                     |            | 0                          | small           | high          | •                     | 1                         | small           | high          |                       | 0                          | n/a             |               | •                     | 1                           |                 | high          |                       |
| Grip75      | TUBGCP4         | 1                 |                 | high          |                       |            | 0                          | small           | high          | •                     | 1                         |                 | high          |                       | 0                          | n/a             | high          | •                     | 1                           |                 | high          | •                     |
| Grip71      | NEDD1           | 1                 |                 | high          | •                     | < G1       | 0                          | small           | high          | •                     | 1                         |                 | high          | •                     | 0                          | n/a             | high          | •                     | 1                           |                 | high          |                       |
| eIF3-S8     | EIF3S8          | 1                 | large           | high          |                       |            | 0                          | small           | high          | •                     | 1                         | large           | high          |                       | 0                          | n/a             | high          | •                     | 1                           | large           | high          |                       |
| bel         | DDX3X           | 1                 |                 | high          |                       |            | 0                          | small           | high          | •                     |                           | large           | high          |                       | 0                          | n/a             | high          | •                     | 1                           |                 | high          | •                     |
| apt         | -               | 1                 | large           | low           |                       |            | 0                          | small           | high          | •                     |                           | small           | high          | •                     | 0                          | n/a             |               | •                     | 1                           |                 |               |                       |
| CG18190     | -               | >2                |                 |               |                       | > G2       | 0                          | small           | high          | •                     |                           | small           | high          |                       | 0                          | n/a             |               | •                     | 1                           |                 |               |                       |
| Spd-2       | CEP192          | 1                 | small           |               |                       |            | 0                          | small           | high          | •                     |                           | small           | high          |                       | 0                          | n/a             |               | •                     | 1                           | small           | low           |                       |
| Lam         | LMNB2           | 1                 | large           |               |                       |            | 0                          | small           | high          | •                     | 1                         |                 | high          |                       | 0                          | n/a             | high          | •                     | 1                           |                 |               |                       |
| cnn         | CDK5RAP2        | 0                 | small           |               |                       |            | 0                          | small           | high          | •                     | 0                         | small           | high          |                       | 0                          | n/a             |               | •                     | 0                           |                 | low           |                       |
| Dcp1        | DCP1B           |                   | large           |               |                       |            | 0                          | small           | high          | •                     |                           |                 | high          |                       | 0                          | n/a             | high          | •                     | 1                           |                 | low           |                       |
| LBR         | LBR             |                   | small           | low           |                       |            | 0                          | small           | high          | •                     |                           | small           | high          |                       | 0                          | n/a             |               | •                     | 1                           | small           | low           |                       |
| Nup98       | NUP98           |                   |                 | low           |                       | > G2       | 0                          | small           | high          | •                     |                           |                 |               | •                     | 0                          | n/a             |               | •                     | 1                           |                 | low           |                       |
| Ote         | -               |                   |                 |               |                       | < G1       | 0                          | small           | high          | •                     |                           |                 |               |                       | 0                          | n/a             |               | •                     | 1                           |                 | low           |                       |
| CG5726      | -               |                   |                 | low           |                       |            | 0                          | small           | high          | •                     |                           |                 | high          |                       | 0                          | n/a             | high          | •                     | 1                           |                 | low           |                       |
| qua         | -               |                   |                 |               |                       | > G2       | 0                          | small           | high          | •                     |                           | small           | high          |                       | 0                          | n/a             |               | •                     | 1                           |                 |               |                       |
| cup         | -               |                   |                 |               |                       | > G2       | 0                          | small           | high          | •                     |                           | small           | high          |                       | 0                          | n/a             |               | •                     | 1                           |                 | low           |                       |
| CG31326     | -               |                   |                 |               |                       | > G2       | 0                          | small           | high          | •                     |                           | small           | high          |                       | 0                          | n/a             | low           | •                     | 1                           |                 |               |                       |
| CG6927      | -               |                   |                 |               |                       | > G2       | 0                          | small           | high          | •                     |                           | small           | high          |                       | 0                          | n/a             | high          | •                     | 1                           |                 | high          |                       |
| ewg         | NRF1            |                   |                 |               |                       | > G2       | 0                          | small           | high          | •                     |                           | small           | high          |                       | 0                          | n/a             |               | •                     | 1                           |                 |               |                       |
| CG14309     | -               |                   |                 |               |                       |            | 0                          | small           | high          | •                     |                           | small           | high          |                       | 0                          | n/a             |               | •                     | 1                           |                 | low           |                       |
| ndl         | -               |                   |                 |               |                       |            | 0                          | small           | high          | •                     |                           | small           | high          |                       | 0                          | n/a             |               | •                     | 1                           |                 |               |                       |
| gp210       | NUP210          |                   |                 |               |                       |            | 0                          | small           | high          | •                     |                           | small           | high          |                       | 0                          | n/a             |               | •                     | 1                           |                 | low           |                       |
| CG15435     | -               |                   |                 |               |                       |            | 0                          | small           | high          | •                     |                           | small           | high          |                       | 0                          | n/a             |               | •                     | 1                           |                 |               |                       |
| ball        | VRK1            |                   |                 |               |                       |            | 0                          | small           | high          | •                     |                           | small           | high          | •                     | 0                          | n/a             |               | •                     | 1                           |                 | high          |                       |
| polo        | PLK1            | 0                 | small           | high          | •                     | < G1/ > G2 | 0                          | small           | high          | •                     |                           |                 |               |                       |                            |                 |               |                       |                             |                 |               |                       |
| aur         | AURKA           |                   | small           | high          |                       |            |                            |                 |               |                       |                           | small           | high          |                       |                            |                 |               |                       |                             |                 |               |                       |
| cdc2        | CDC2            | 0                 |                 |               | •                     | > G2       |                            |                 |               |                       |                           |                 |               | 0                     | n/a                        |                 | •             |                       |                             |                 |               |                       |
| Ckl1β       | CSNK2B          | 1                 |                 |               |                       | > G2       |                            |                 |               |                       |                           |                 |               |                       |                            |                 |               |                       | 1                           |                 |               |                       |
